# Supplementary material
Source: publisher figshare collection journal article supplement (https://acs.figshare.com/ndownloader/files/4297492)

PAM surface (2kV)

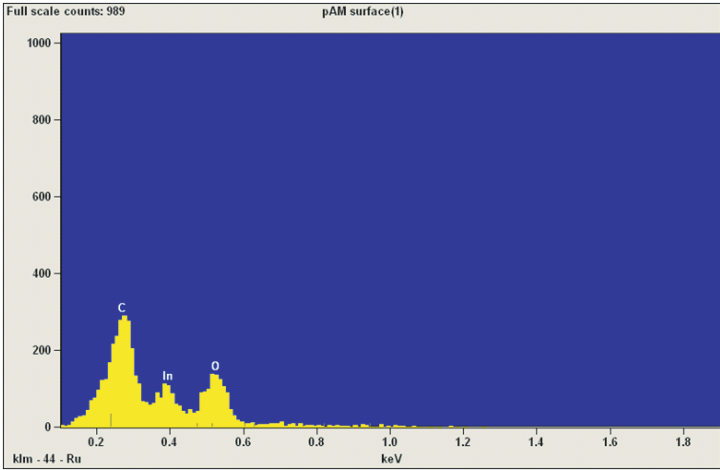

Glass surface (2kV)

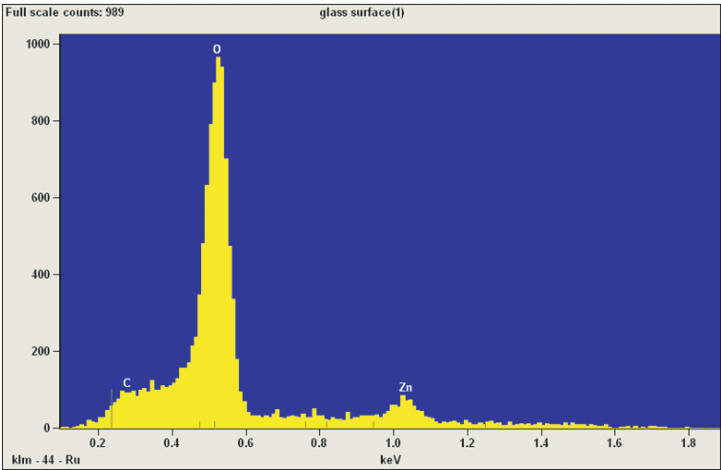

PAM surface etched by oxygen plasma (2kV)

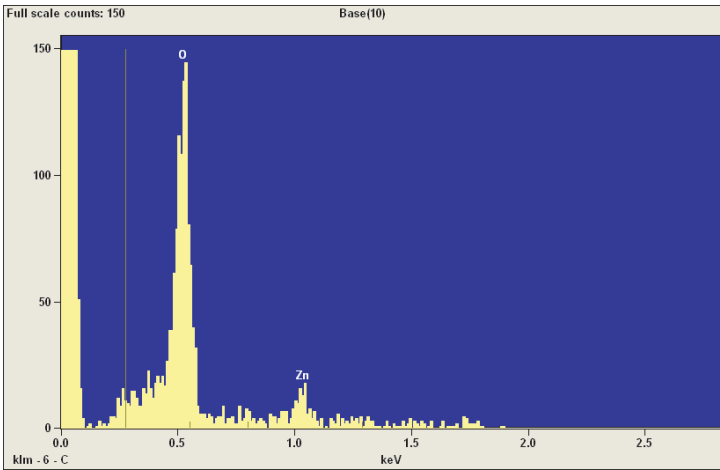

Glass surface after oxygen plasma (2kV)

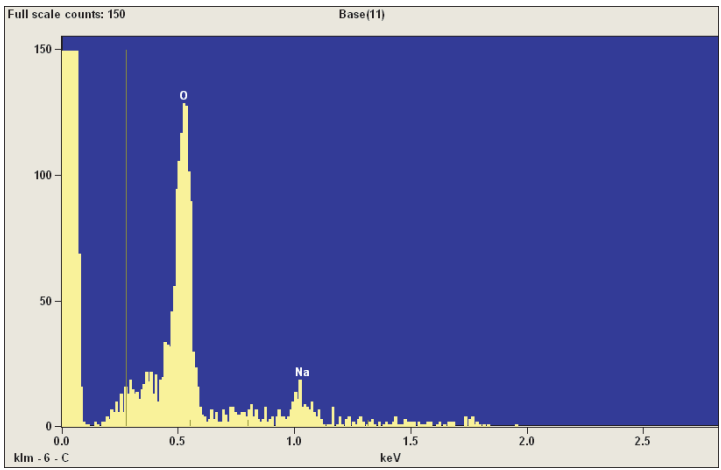

Supplement: Supplementary file 1 [file 4297492]
